# Supplementary material for: Impaired islet function and normal exocrine enzyme secretion occur with low inter-regional variation in type 1 diabetes
Source: PubMed Central journal article supplement — Cell Rep. Author manuscript; Available in PMC 2024 Jul 16. (PMC11251461; doi:10.1016/j.celrep.2024.114346), 2024-06-07
Supplement: NIHMS2005260-supplement-1.pdf [file NIHMS2005260-supplement-1.pdf]

**Cell Reports, Volume 43**

**Supplemental information**

**Impaired islet function and normal exocrine  
enzyme secretion occur with low  
inter-regional variation in type 1 diabetes**

**Denise M. Drotar, Ana Karen Mojica-Avila, Drew T. Bloss, Christian M. Cohrs, Cameron T. Manson, Amanda L. Posgai, MacKenzie D. Williams, Maigan A. Brusko, Edward A. Phelps, Clive H. Wasserfall, Stephan Speier, and Mark A. Atkinson**

**Table S1. Characteristics of ND, AAb+, and T1D organ donors with secretion data collected from head, body, and tail pancreas regions.**

| Donor no. | nPOD ID | Donor Type | Autoantibody status    | Age (years) | Diabetes Duration (months) | Sex | C-peptide (ng/ml) | HbA1c (%) | BMI  |
|-----------|---------|------------|------------------------|-------------|----------------------------|-----|-------------------|-----------|------|
| 1         | 6540    | ND         | Negative               | 6.86        | N/A                        | F   | 2.03              | 5.8       | 18.3 |
| 2         | 6543    | ND         | Negative               | 3.50        | N/A                        | M   | 1.45              | 5.3       | 17.4 |
| 3         | 6544    | ND         | Negative               | 12.45       | N/A                        | M   | 8.66              | 5.2       | 23.4 |
| 4         | 6546    | ND         | Negative               | 22.29       | N/A                        | M   | 11.00             | 5.6       | 23.7 |
| 5         | 6547    | ND         | Negative               | 6.64        | N/A                        | F   | 3.89              | 5.5       | 24.8 |
| 6         | 6548    | ND         | Negative               | 20.24       | N/A                        | M   | 4.04              | 5.7       | 23.8 |
| 7         | 6552    | ND         | Negative               | 33.87       | N/A                        | F   | 1.80              | 5.6       | 21.9 |
| 8         | 6556    | ND         | Negative               | 34.60       | N/A                        | M   | 11.43             | 5.5       | 30.8 |
| 9         | 6559    | ND         | Negative               | 23.46       | N/A                        | F   | 7.02              | 5.3       | 26.3 |
| 10        | 6560    | ND         | Negative               | 34.36       | N/A                        | F   | 10.36             | 5.9       | 26.6 |
| 11        | CV14    | ND         | Negative               | 9.00        | N/A                        | M   | 4.40              | 5.7       | 13.7 |
| 12        | 6571    | ND         | Negative               | 28.10       | N/A                        | M   | 4.57              | 6.1       | 29.7 |
| 13        | 6583    | ND         | Negative               | 30.54       | N/A                        | M   | 10.55             | 5.0       | 24.8 |
| 14        | 6584    | ND         | Negative               | 22.53       | N/A                        | M   | 6.02              | 5.3       | 21.1 |
| 15        | 6586    | ND         | Negative               | 13.21       | N/A                        | M   | 6.83              | 5.1       | 27.4 |
| 16        | 6553    | AAb+       | mIAA+                  | 12.34       | N/A                        | F   | 4.62              | 5.7       | 24.8 |
| 17        | 6558    | AAb+       | GAD+                   | 21.69       | N/A                        | F   | 8.03              | 4.4       | 27.8 |
| 18        | 6562    | AAb+       | GAD+                   | 29.77       | N/A                        | F   | 13.19             | 5.6       | 18.2 |
| 19        | 6569    | AAb+       | GAD+                   | 20.00       | N/A                        | F   | 2.44              | 6.0       | 24.2 |
| 20        | 6573    | AAb+       | GAD+                   | 24.48       | N/A                        | F   | 1.85              | 5.1       | 35.5 |
| 21        | 6575    | AAb+       | GAD+                   | 23.53       | N/A                        | M   | 5.21              | 5.5       | 26.9 |
| 22        | 6582    | AAb+       | GAD+                   | 22.38       | N/A                        | F   | 2.67              | 5.6       | 23.0 |
| 23        | 6550    | T1D        | GAD+ ZnT8+             | 25.06       | 0                          | M   | <0.02             | 14.0      | 16.4 |
| 24        | 6551    | T1D        | GAD+ IA-2+ mIAA+ ZnT8+ | 20.70       | 7                          | M   | 0.11              | 6.4       | 23.1 |
| 25        | 6563    | T1D        | IA-2+                  | 14.60       | 0                          | F   | 1.04              | 9.6       | 25.5 |
| 26        | 6578    | T1D        | IA2+ ZnT8+             | 11.95       | 0                          | F   | 0.35              | 13.6      | 22.2 |
| 27        | 6579    | T1D        | GAD+ mIAA+             | 13.91       | 14                         | F   | 0.31              | 15.0      | 18.4 |

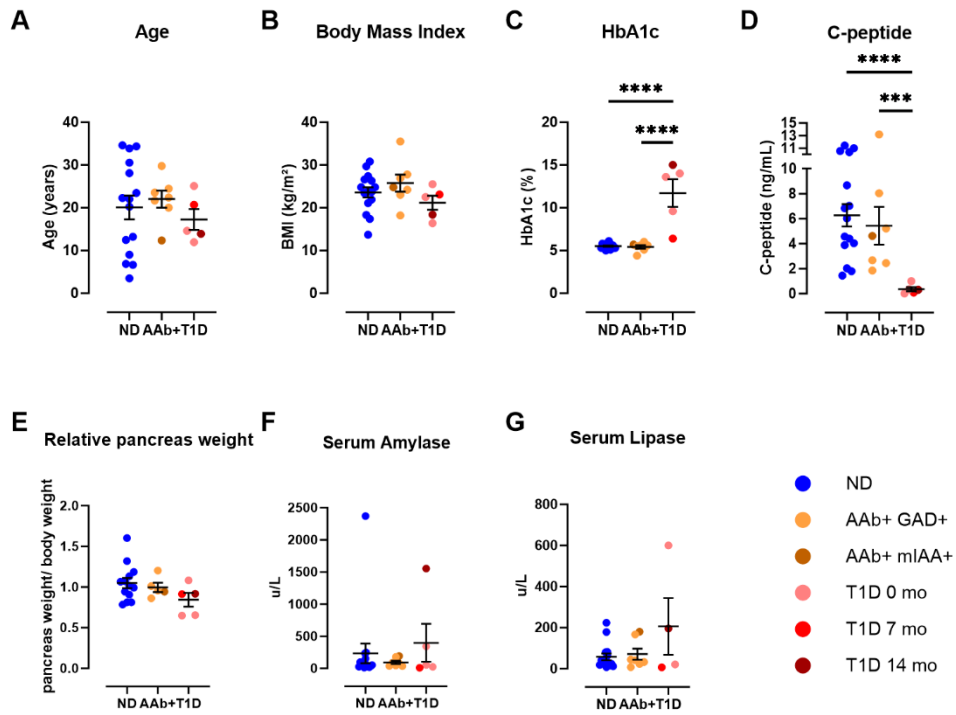

**Figure S1. Characteristics of organ donors used for functional studies, Related to Table S1**

Donor age (A), body mass index (B), hemoglobin A1c (C), serum C-peptide (D), relative pancreas weight (E) and serum amylase (F) and lipase (G) levels.

n=15 ND, 7 1AAb+ and 5 T1D donors

Dots represent individual donors shown with mean  $\pm$  SEM and one-way ANOVA of log-transformed data.

\*\*\*p<0.001; \*\*\*\*p<0.0001.

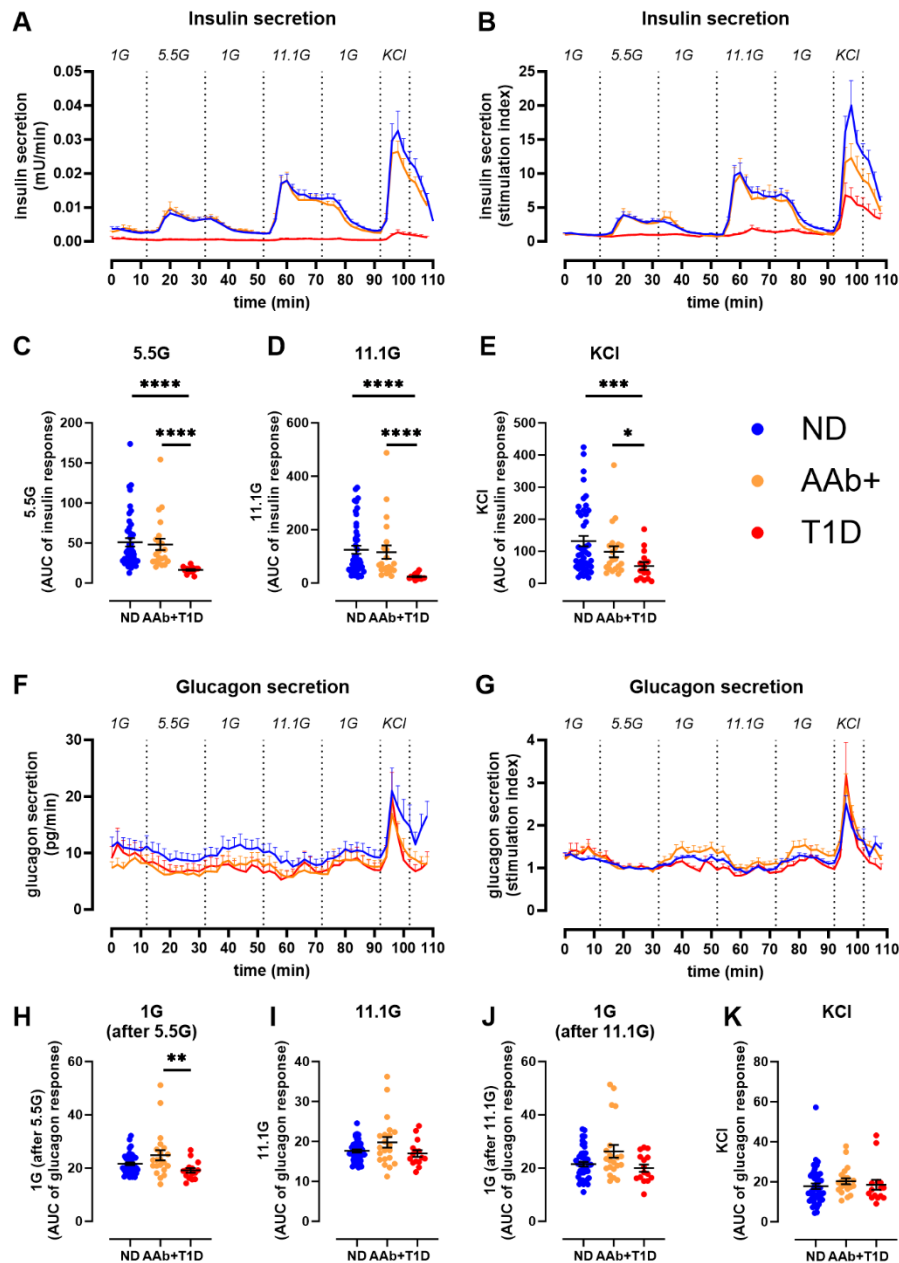

**Figure S2. Insulin and glucagon secretion in AAb+ and recent-onset T1D, Related to Figure 2**

A-B. Insulin secretion from slices of ND (blue), 1AAb+ (orange) and recent-onset T1D (red) donors (mean of pancreas head, body and tail) shown as absolute amounts (A) and stimulation index (fold of 1G baseline) (B).

C-E. Quantification of insulin responses to 5.5G (C), 11.1G (D), and KCl (E).

F-G. Glucagon secretion from slices of ND (blue), 1AAb+ (orange) and recent-onset T1D (red) donors (mean of pancreas head, body and tail) shown as absolute amounts (F) and stimulation index (fold of 5.5G baseline) (G).

H-K. Quantification of glucagon responses to 1G (H), 11.1G (I), 1G (J), and KCl (K).

n=15 ND, 7 1AAb+, 5 T1D donors, with 4 slices/region/donor

Dots represent individual donors shown with mean  $\pm$  SEM and one-way ANOVA of log-transformed data.

\*p<0.05; \*\*p<0.01; \*\*\*p<0.001; \*\*\*\*p<0.0001.

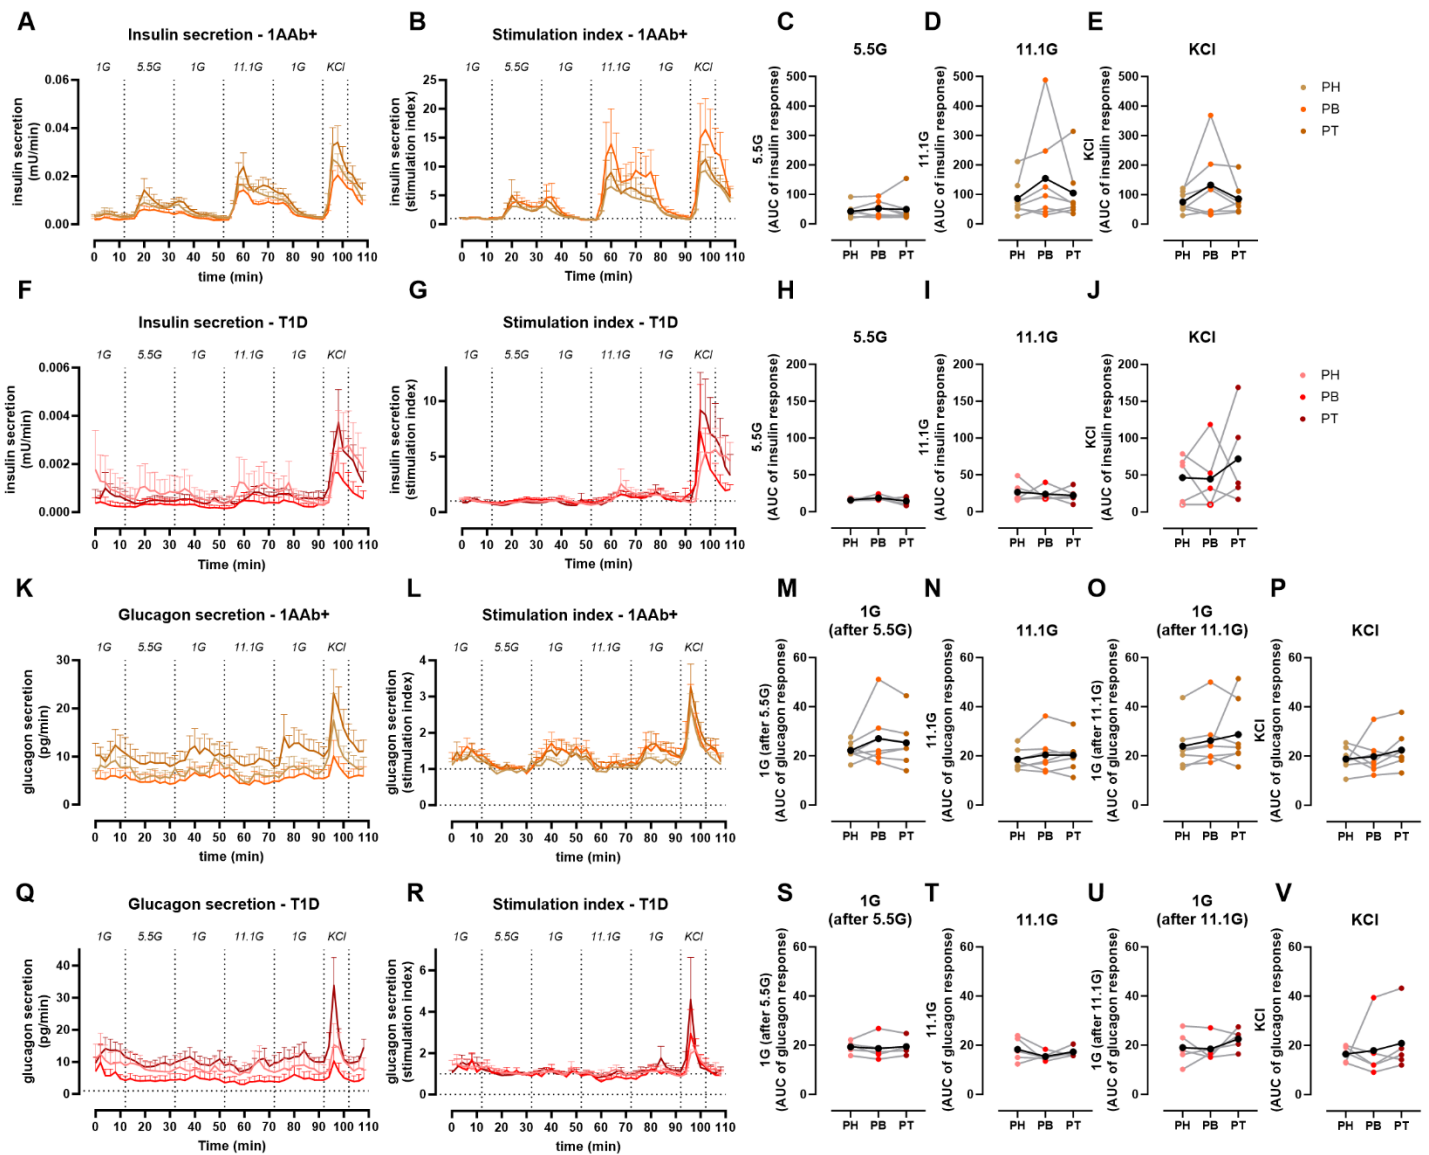

**Figure S3. Insulin and glucagon secretion across all pancreas regions in AAb+ and recent-onset T1D, Related to Figure 2**

A-B. Insulin secretion from slices of the pancreas head, body, and tail of 1AAb+ donors shown as absolute amounts (A) and stimulation index (fold of 1G baseline) (B).

C-E. Quantification of insulin responses to 5.5G (C), 11.1G (D), and KCl (E).

F-G. Insulin secretion from slices of the pancreas head, body, and tail of T1D donors shown as absolute amounts (F) and stimulation index (fold of 1G baseline) (G).

H-J. Quantification of insulin responses to 5.5G (H), 11.1G (I), and KCl (J).

K-L. Glucagon secretion from slices of the pancreas head, body and tail of 1AAb+ donors shown as absolute secreted amounts (K) and stimulation index (fold of 5.5G baseline) (L).

M-P. Quantification of glucagon responses to 1G (M), 11.1G (N), 1G (O), and KCl (P).

Q-R. Glucagon secretion from slices of the pancreas head, body and tail of T1D donors shown as absolute amounts (Q) and stimulation index (fold of 5.5G baseline) (R).

S-V. Quantification of glucagon responses to 1G (S), 11.1G (T), 1G (U), and KCl (V).

n=15 ND, 7 1AAb+, 5 T1D donors, with 4 slices/region/donor

Dots represent individual donors with mean  $\pm$  SEM and one-way ANOVA of log-transformed data.

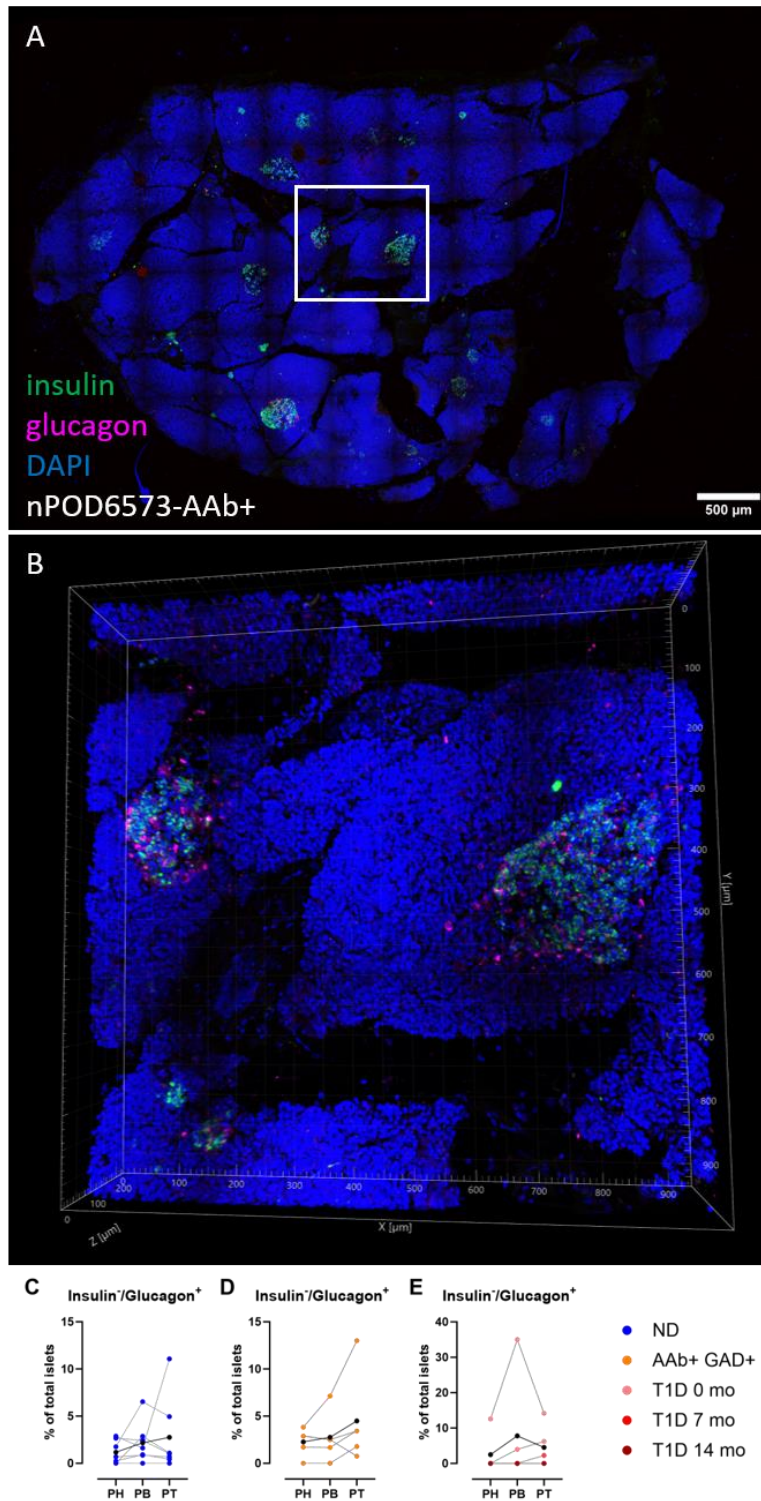

**Figure S4. Example image of a perfused slice used for 3D morphometrical analysis, Related to Figure 4**  
 A-B. Maximum intensity projection of a whole pancreatic tissue slice (A) and 3D view of the squared in area (B) containing islets and acinar tissue from an AAb+ donor stained for insulin (green), glucagon (magenta) and nuclei (DAPI), scale bar=500 $\mu$ m.

C-D. Frequency of insulin/glucagon<sup>+</sup> islets across PH, PB, PT in ND (C), 1AAb+ (D), T1D (E).

n= 7 ND, 5 1AAb+, 5 T1D, with 4 slices/region/donor

Dots represent individual donors with mean  $\pm$  SEM and one-way ANOVA of log-transformed data.
